# Supplementary material for: Randomized Controlled-Feeding Study of Dietary Emulsifier Carboxymethylcellulose Reveals Detrimental Impacts on the Gut Microbiota and Metabolome
Source: PubMed Central journal article supplement — Gastroenterology. Author manuscript; Available in PMC 2022 Nov 7. (PMC9639366; doi:10.1053/j.gastro.2021.11.006), 2021-11-11
Supplement: NIHMS1843250-supplement-1.pdf [file NIHMS1843250-supplement-1.pdf]

|                                                                                                                     | Timepoints for the 1st three participants                        | Timepoints for other participants                                |
|---------------------------------------------------------------------------------------------------------------------|------------------------------------------------------------------|------------------------------------------------------------------|
| Prior to washout period - collected at home                                                                         | Day 0 - stool                                                    | Day 0 - stool                                                    |
| Washout period                                                                                                      | Day 1 - stool, urine, plasma, buffy coat, serum                  |                                                                  |
| Washout period                                                                                                      | Day 2 - stool, urine, plasma, buffy coat, serum                  |                                                                  |
| Washout period                                                                                                      | Day 3 - stool, urine, plasma, buffy coat, serum                  |                                                                  |
| End of washout period, last samples collected before Randomized diet phase (CMC-containing vs Emulsifier-free diet) | Day 4 - stool, urine, plasma, buffy coat, serum, OGTT, biopsies  | Day 4 - stool, urine, plasma, buffy coat, serum, OGTT, biopsies  |
| CMC exposure                                                                                                        | Day 5 - stool, urine, plasma, buffy coat, serum                  | Day 5 - stool, urine, plasma, buffy coat, serum                  |
| CMC exposure                                                                                                        | Day 6 - stool, urine                                             | Day 6 - stool, urine, plasma, buffy coat, serum                  |
| CMC exposure                                                                                                        | Day 7 - stool, urine                                             | Day 7 - stool, urine, plasma, buffy coat, serum                  |
| CMC exposure                                                                                                        | Day 8 - stool, urine, plasma, buffy coat, serum                  | Day 8 - stool, urine                                             |
| CMC exposure                                                                                                        | Day 9 - stool, urine                                             | Day 9 - stool, urine                                             |
| CMC exposure                                                                                                        | Day 10 - stool, urine, plasma, buffy coat, serum                 | Day 10 - stool, urine                                            |
| CMC exposure                                                                                                        | Day 11 - stool, urine                                            | Day 11 - stool, urine, plasma, buffy coat, serum                 |
| CMC exposure                                                                                                        | Day 12 - stool, urine, plasma, buffy coat, serum                 | Day 12 - stool, urine                                            |
| CMC exposure                                                                                                        | Day 13 - stool, urine                                            | Day 13 - stool, urine, plasma, buffy coat, serum                 |
| CMC exposure                                                                                                        | Day 14 - stool, urine                                            | Day 14 - stool, urine, plasma, buffy coat, serum, OGTT, biopsies |
| CMC exposure                                                                                                        | Day 15 - stool, urine, plasma, buffy coat, serum                 |                                                                  |
| CMC exposure                                                                                                        | Day 16 - stool, urine                                            |                                                                  |
| CMC exposure                                                                                                        | Day 17 - stool, urine, plasma, buffy coat, serum, OGTT, biopsies |                                                                  |
| Post study samples                                                                                                  | Day 48 - stool, plasma, buffy coat, serum                        | Day 48 - stool, plasma, buffy coat, serum                        |
| Post study samples                                                                                                  | Day 107 - stool                                                  | Day 107 - stool                                                  |

**Table S1: Timeline and list of samples collected during the study.**

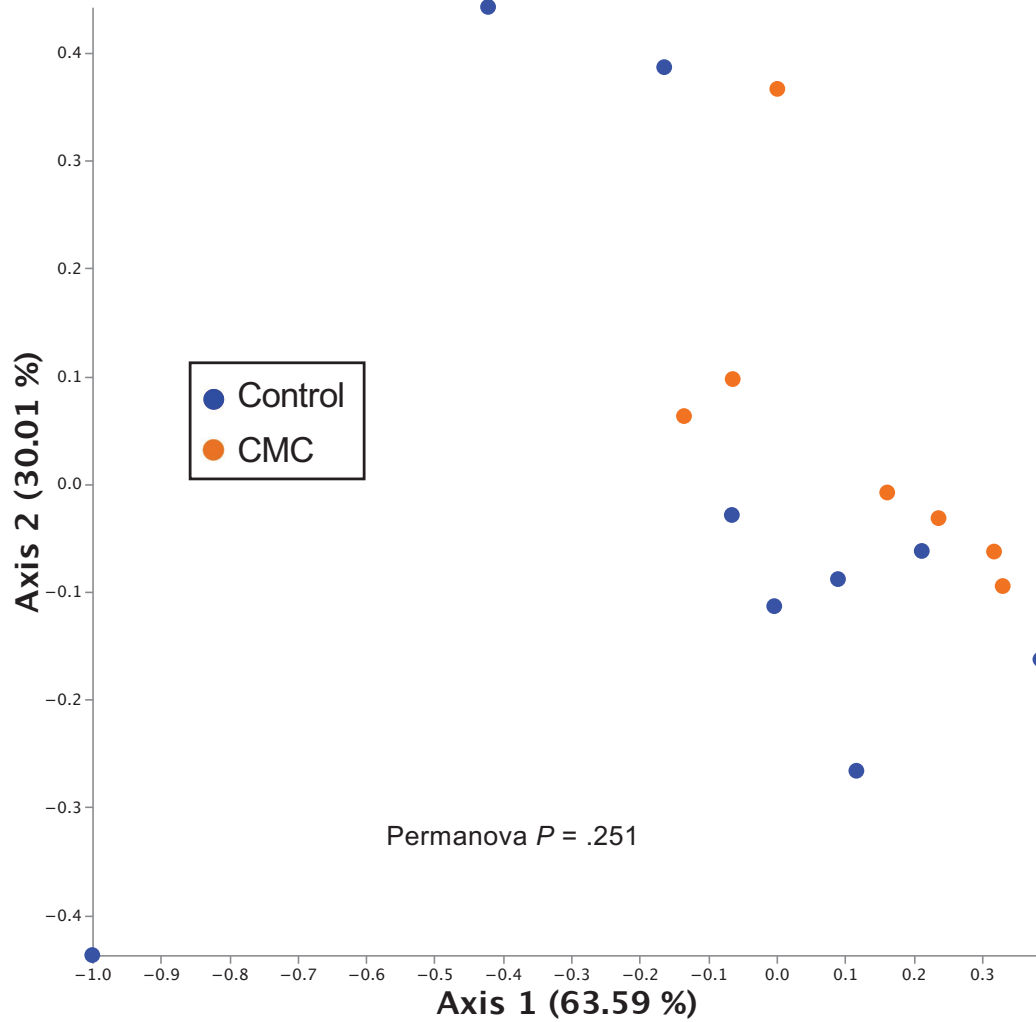

**Figure S1: Dietary habits did not significantly differ between groups at the beginning of the study.**

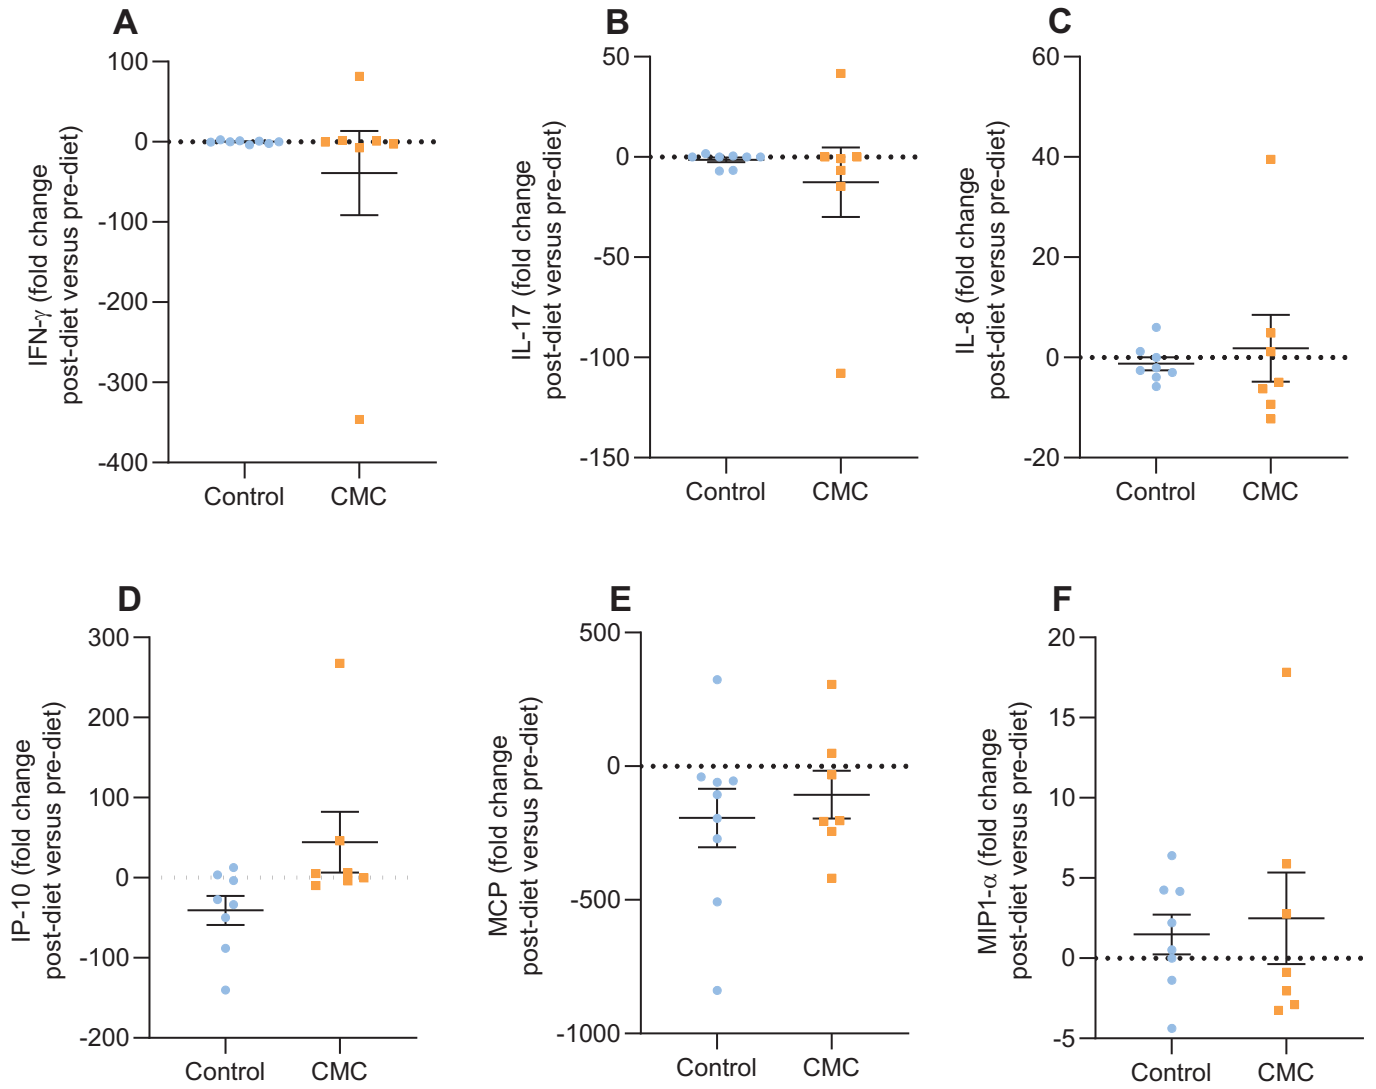

**Figure S2: Impact of carboxymethylcellulose exposure on circulating cytokines.**

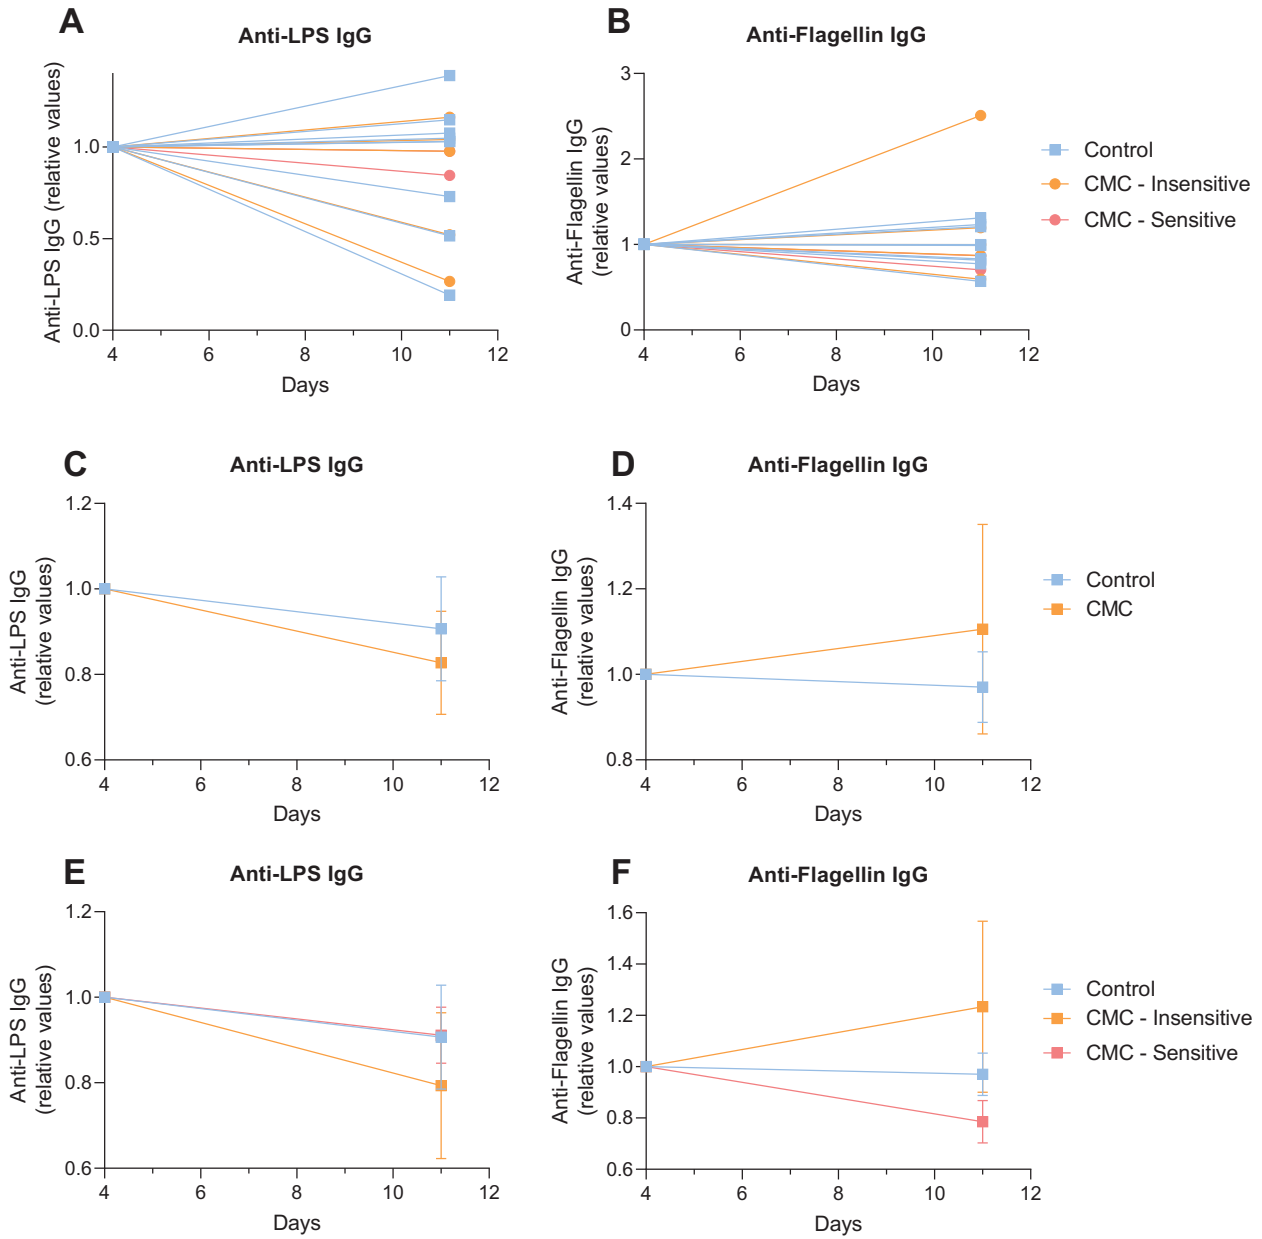

**Figure S3: Impact of carboxymethylcellulose exposure on circulating anti-lipopolysaccharide and anti-flagellin IgG.**

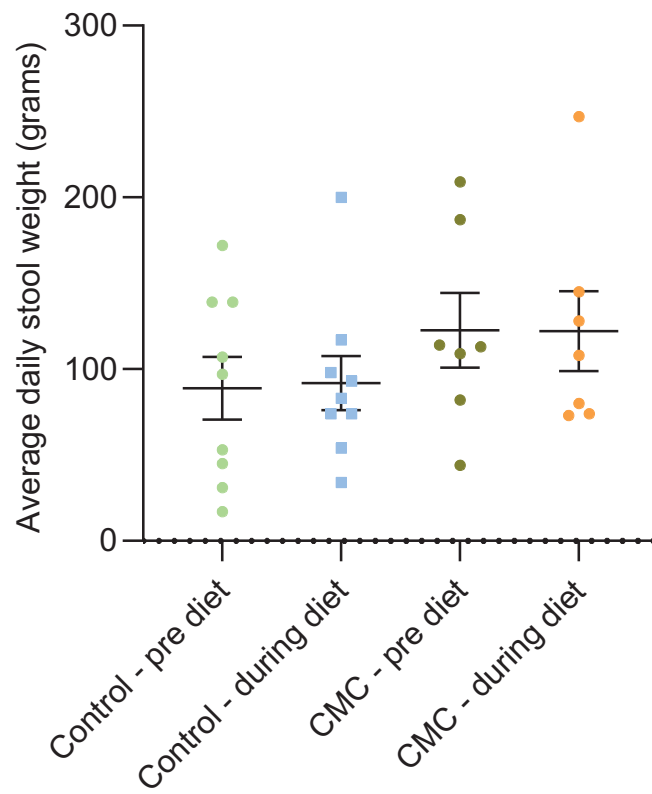

**Figure S4: Impact of carboxymethylcellulose consumption on stool weight.**

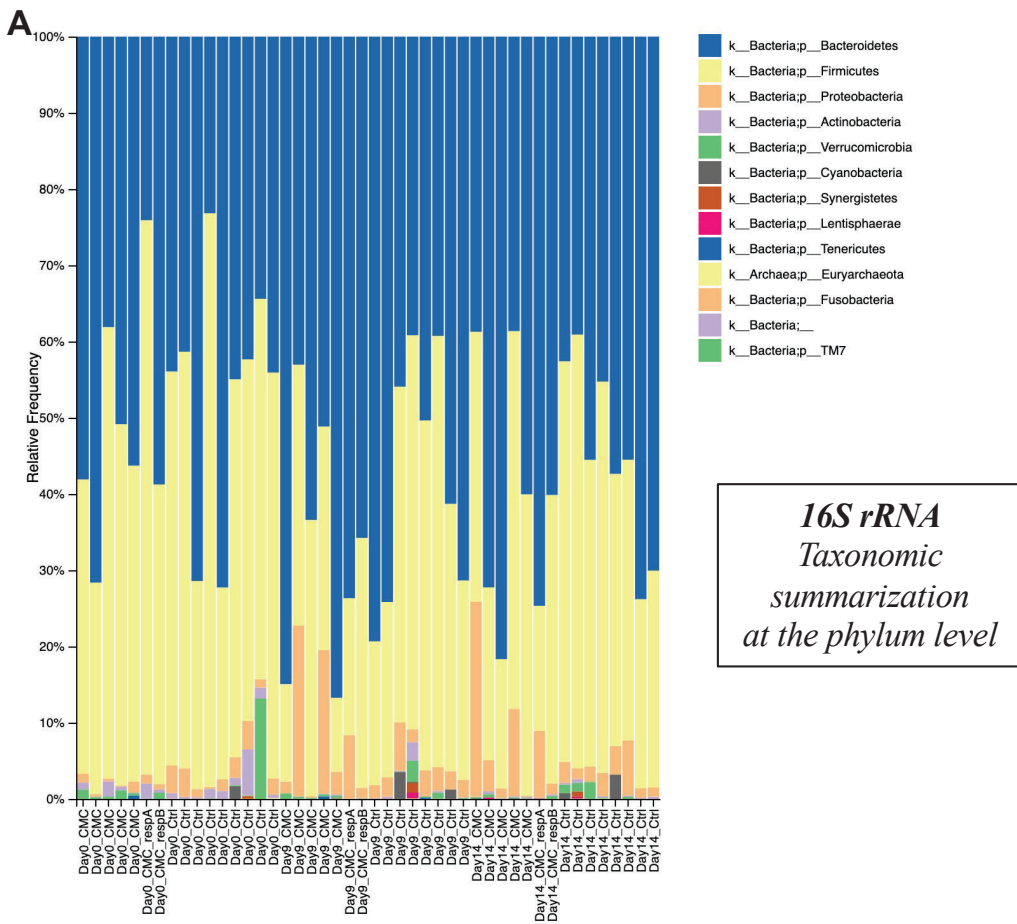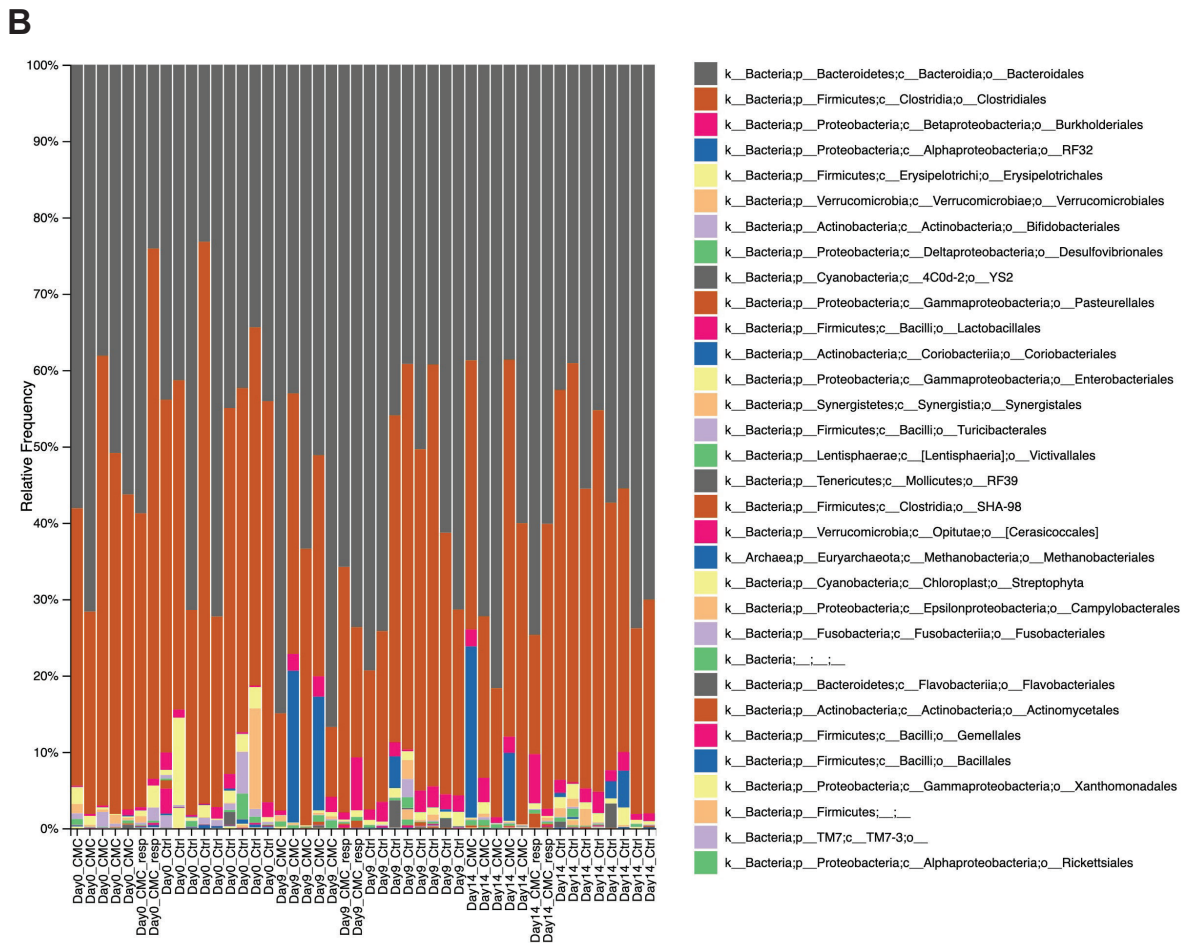

Figure S5: Effect of carboxymethylcellulose consumption on microbiota composition.

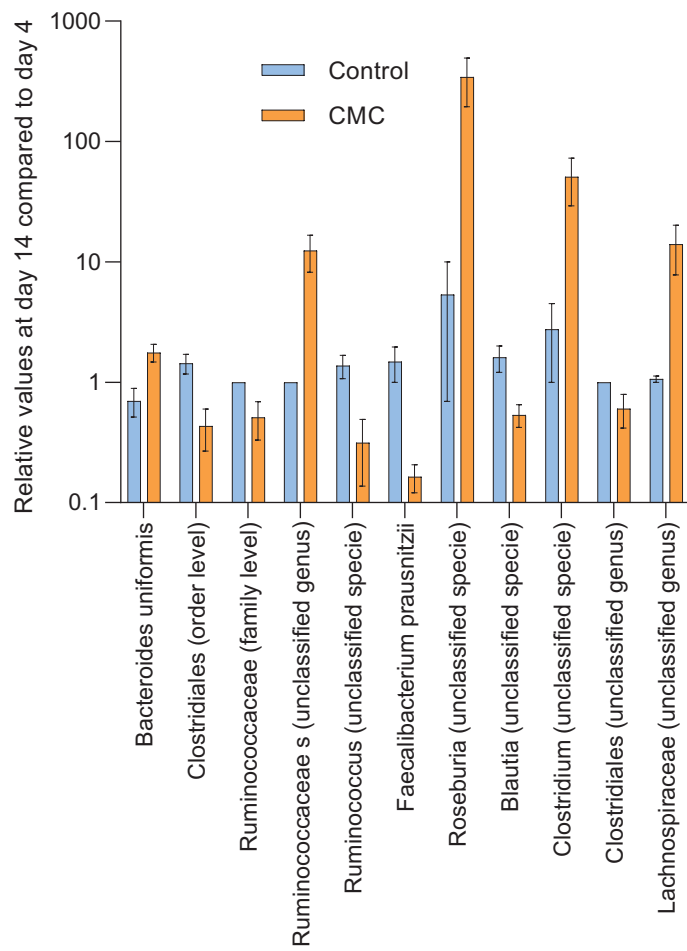

Figure S6: Effect of carboxymethylcellulose consumption on microbiota composition.

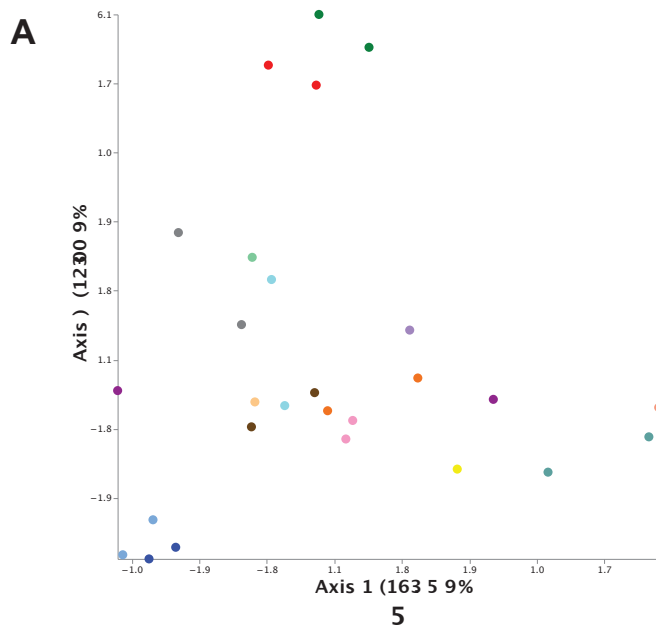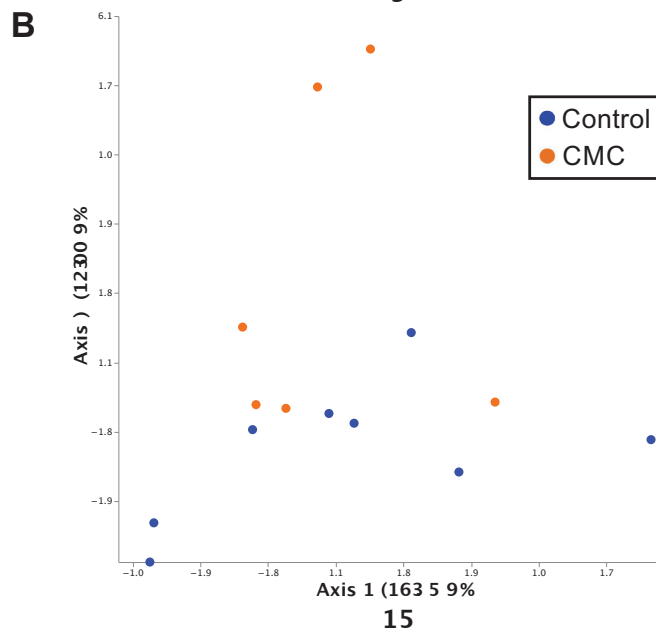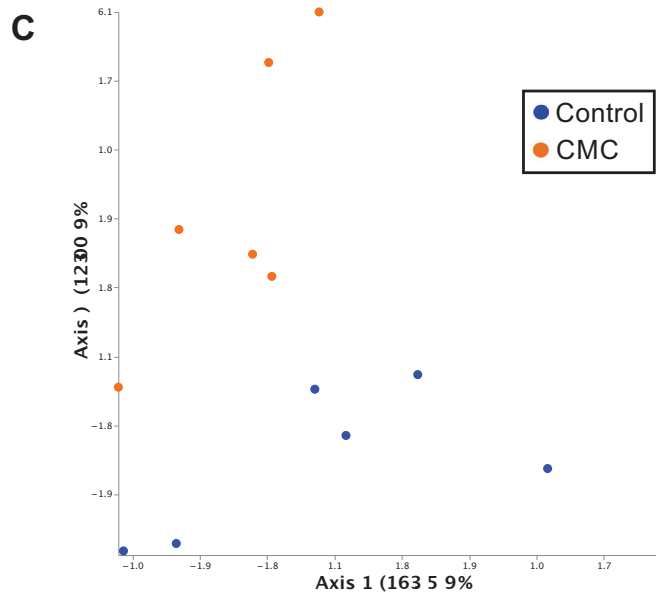

**Figure S7: Effect of carboxymethylcellulose consumption on microbiota taxonomic composition based on metagenomic data.**



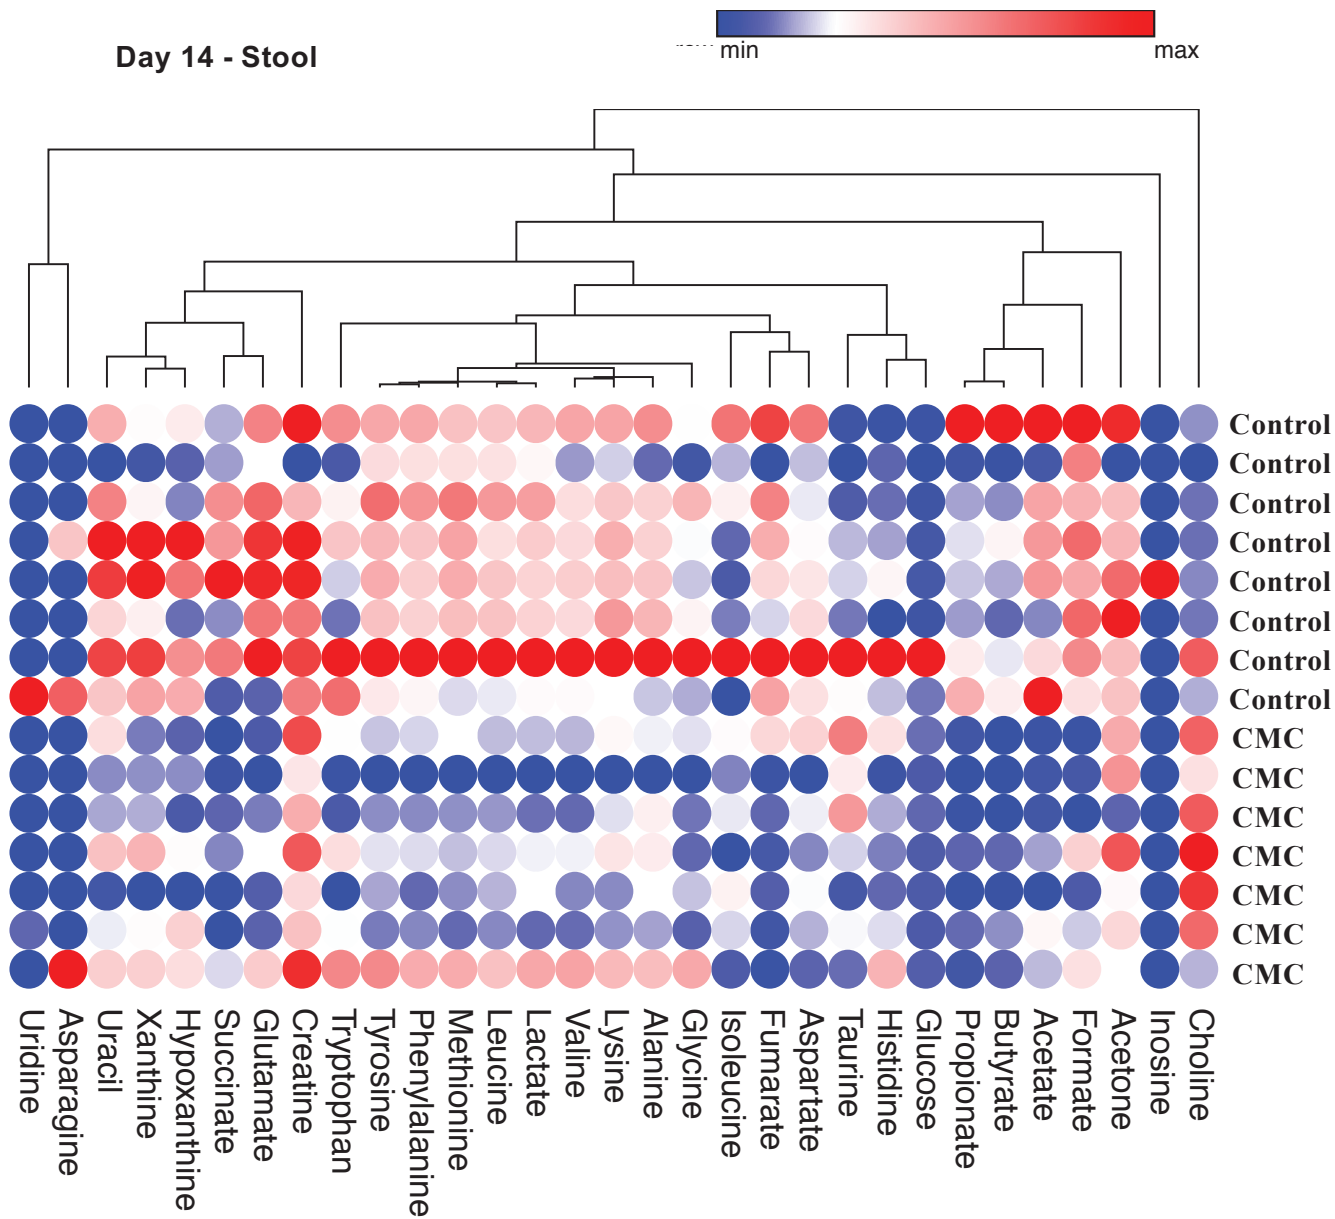

Figure S8: Effect of carboxymethylcellulose consumption on the fecal metabolome.

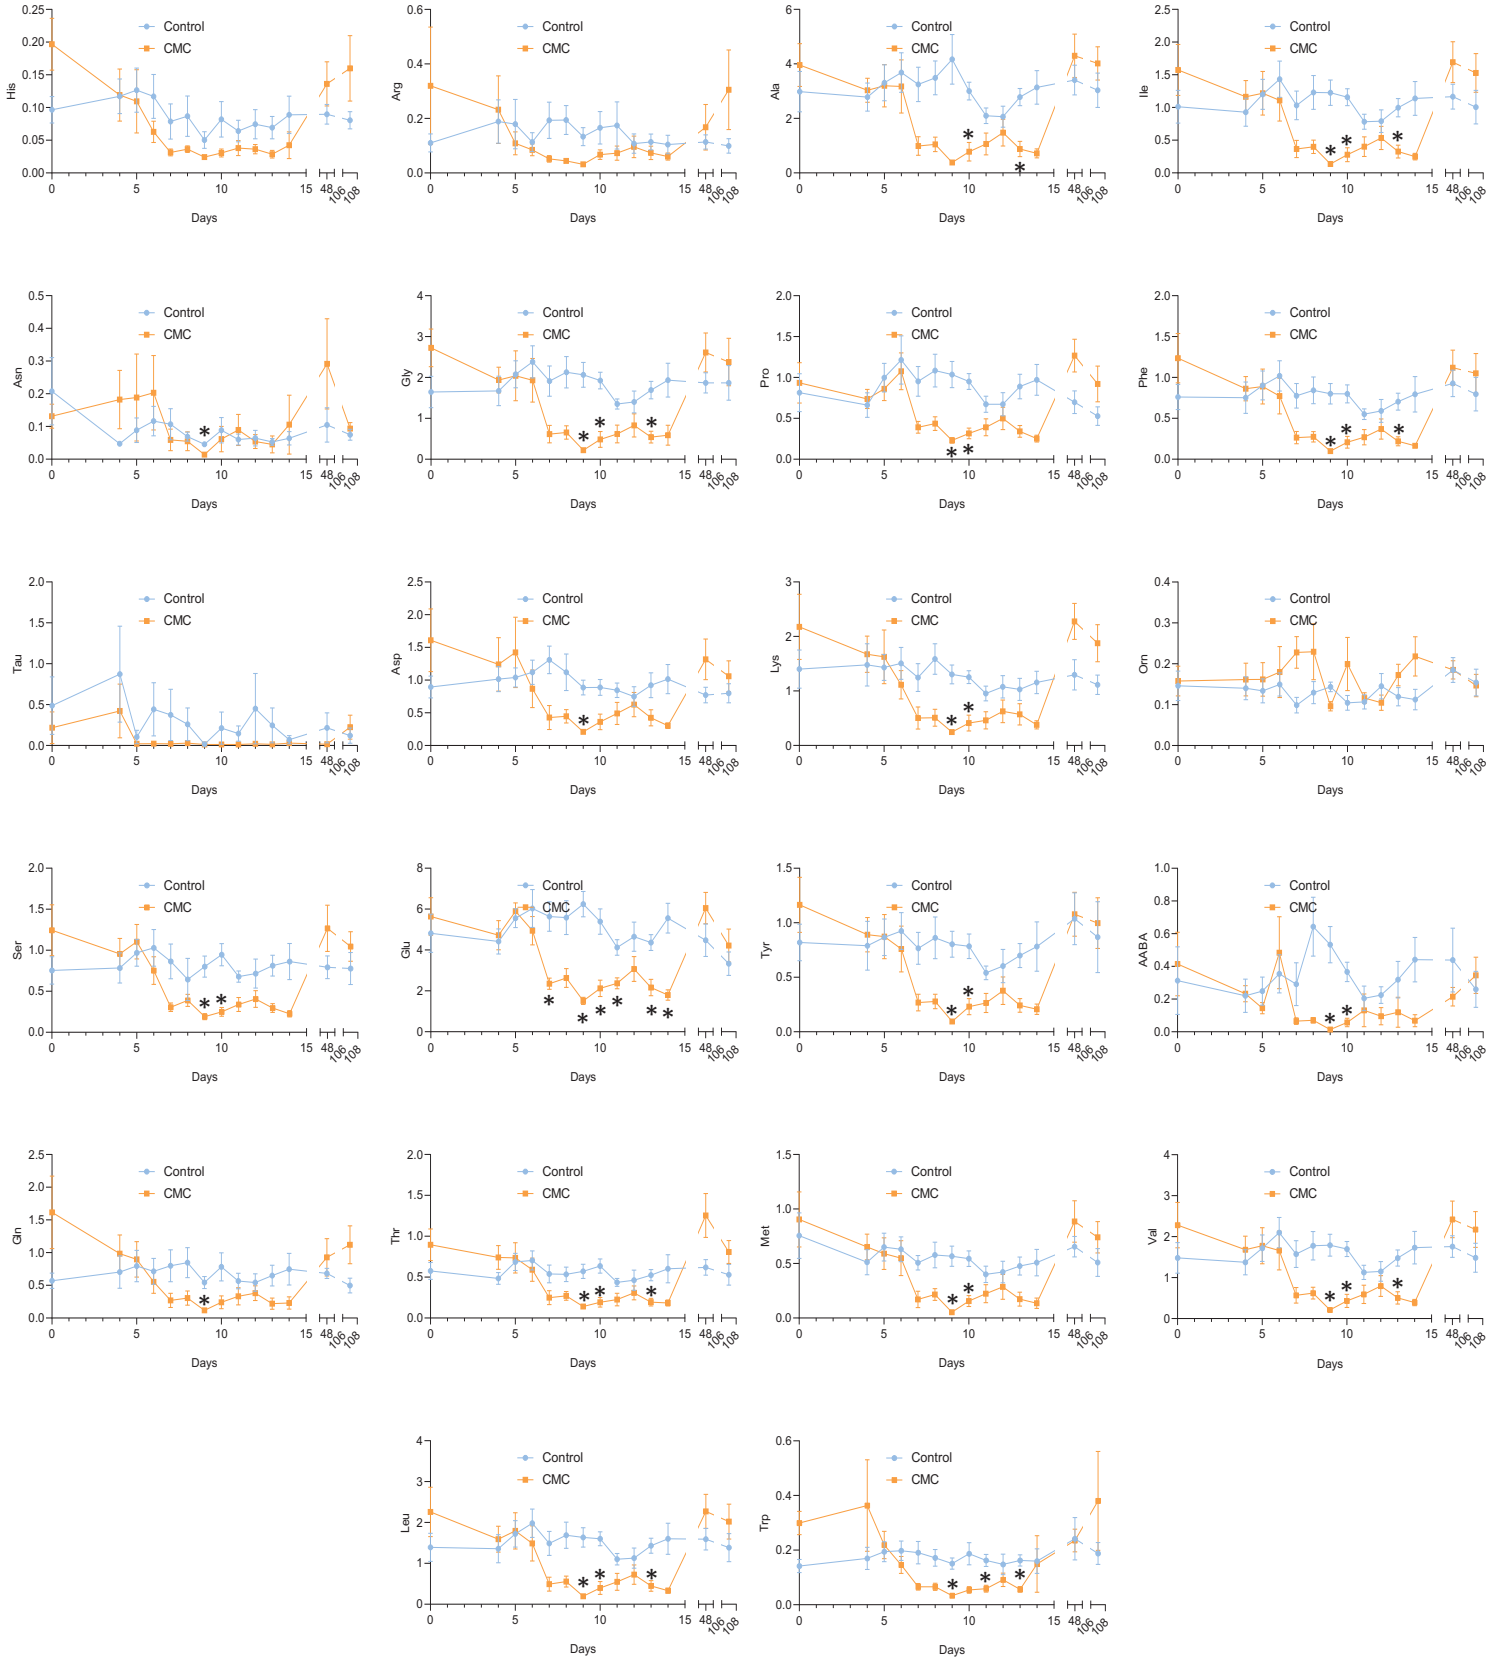

**Figure S9: Effect of carboxymethylcellulose consumption on the fecal metabolome**

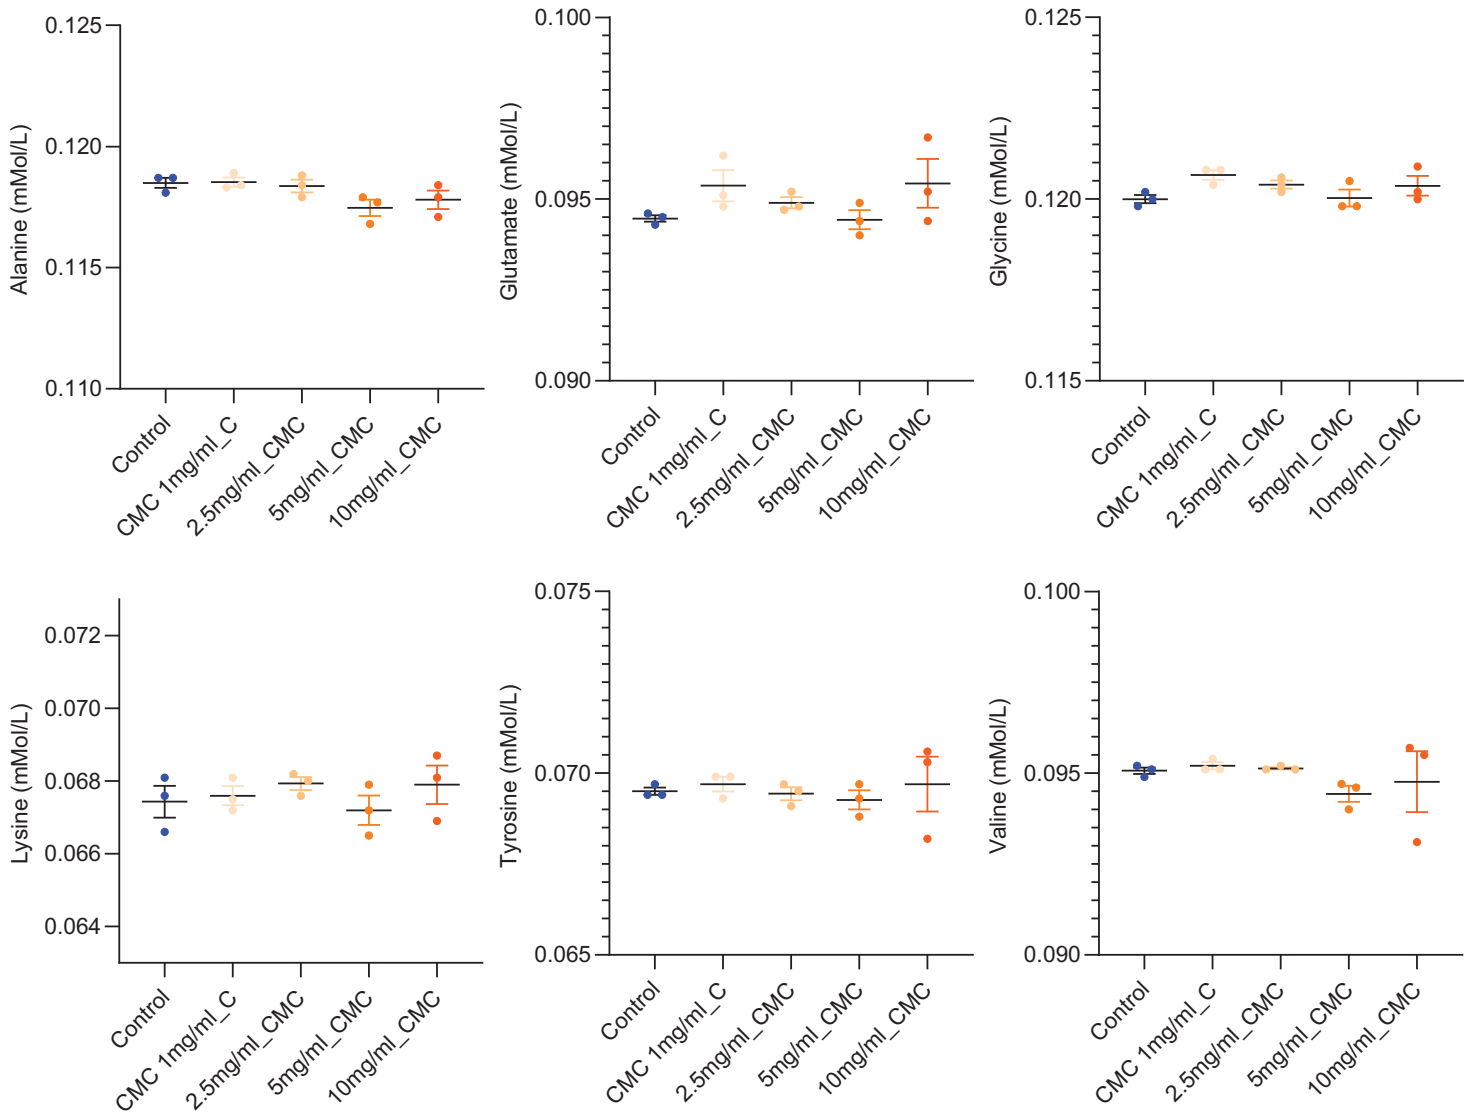

**Figure S10: Impact of carboxymethylcellulose on AccQ•Tag-based detection of various amino acids.**

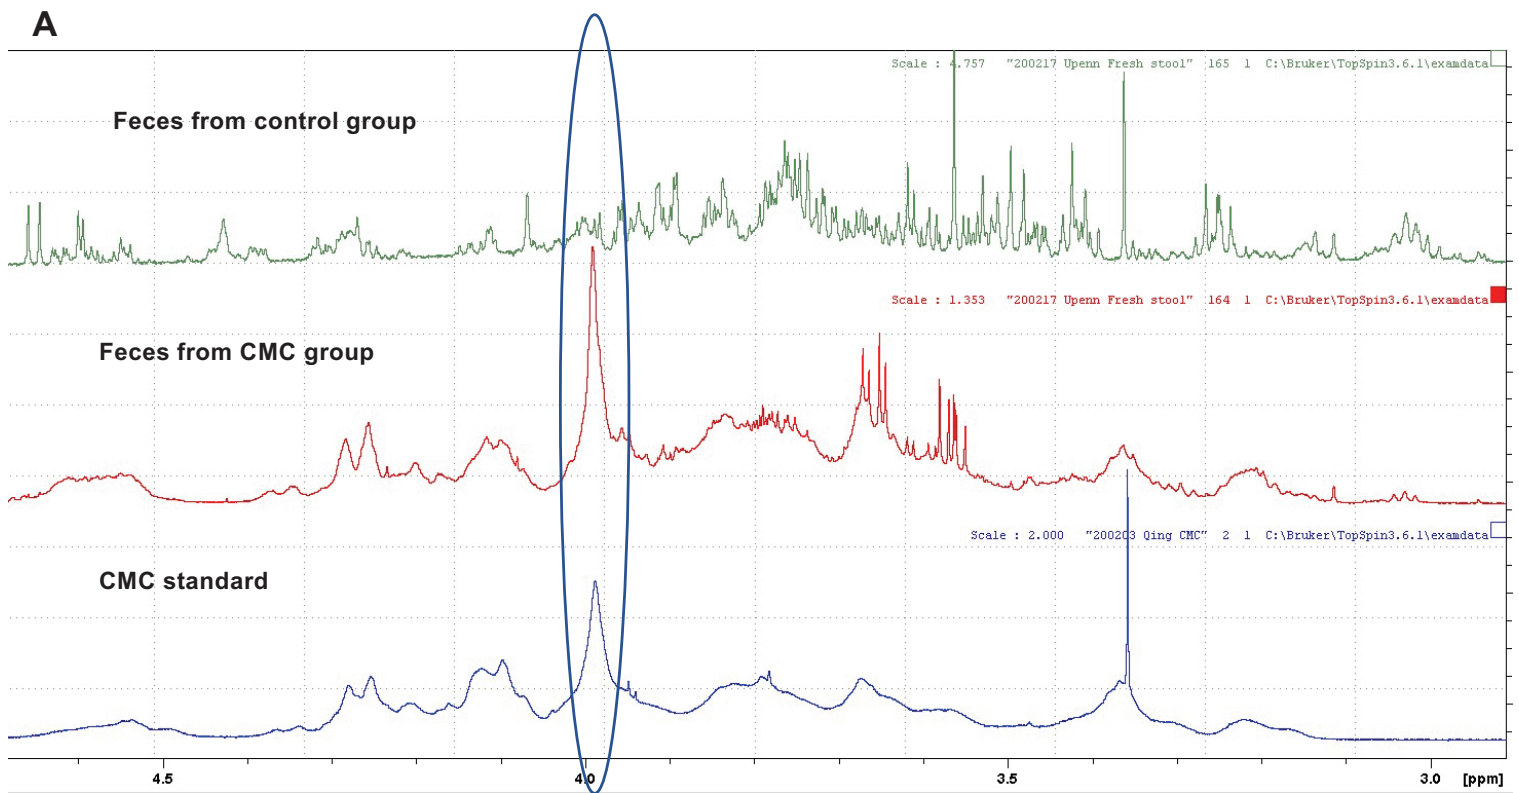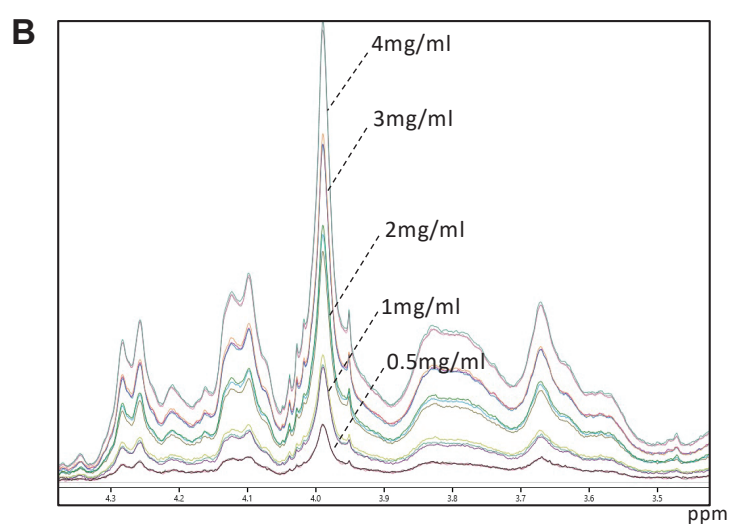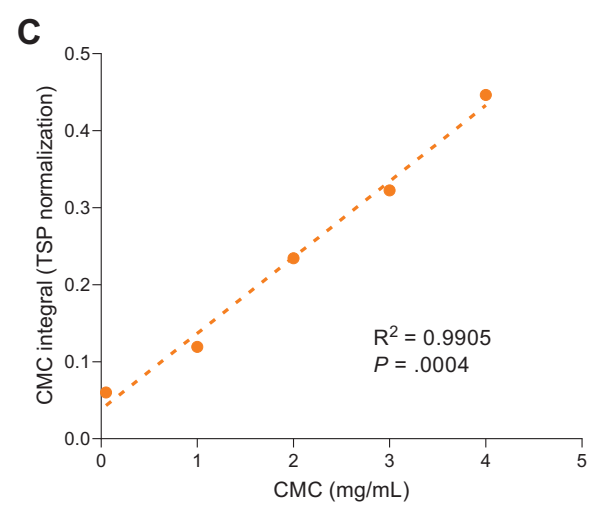

**Figure S11: NMR-based detection of carboxymethylcellulose in fecal samples.**

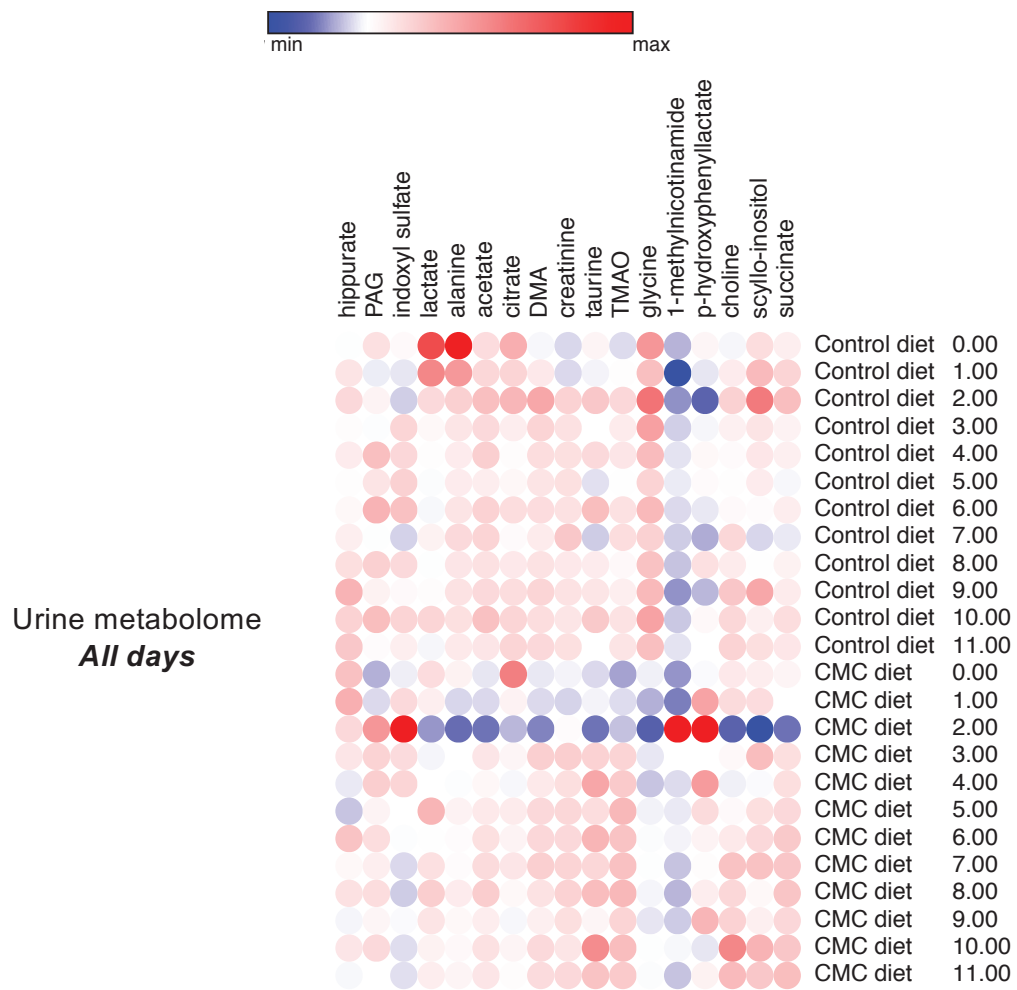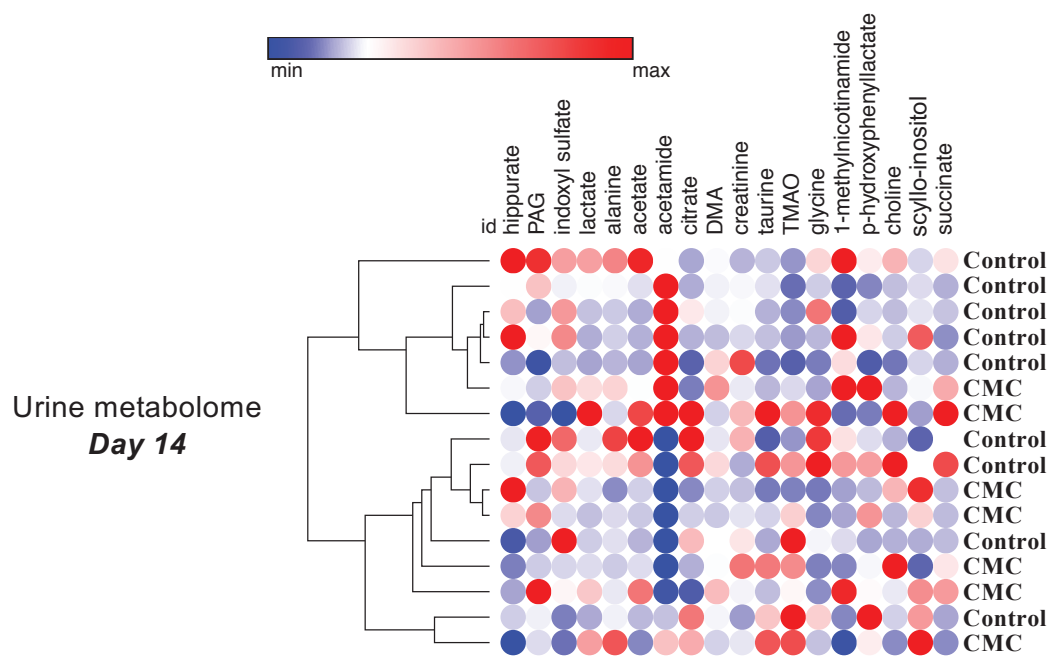

Figure S12: Effect of carboxymethylcellulose consumption on the urine metabolome.

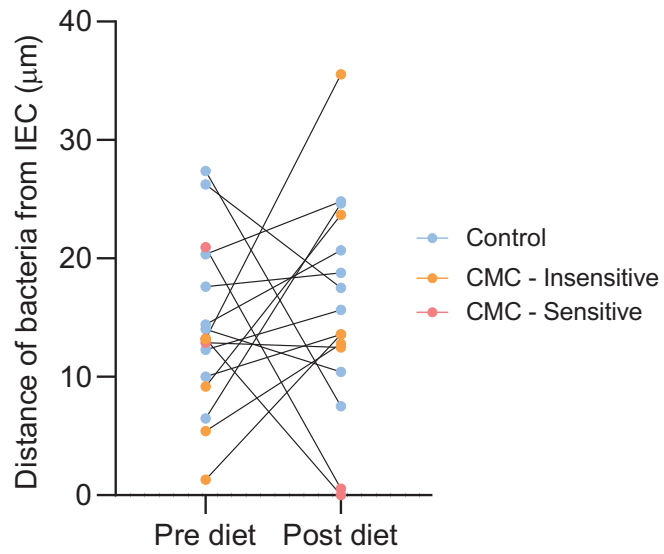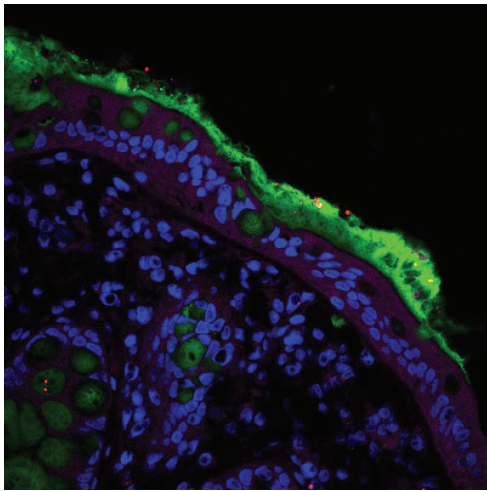

Microbiota - IEC = 14.16µm

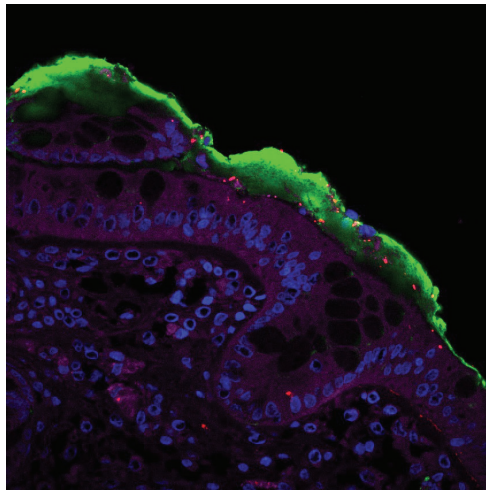

Microbiota - IEC = 2.23µm

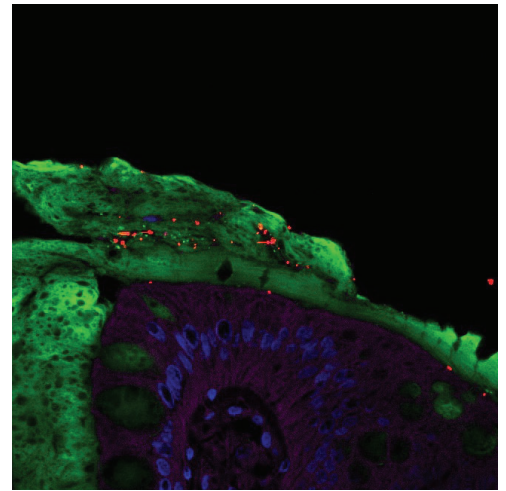

Microbiota - IEC = 0.00µm

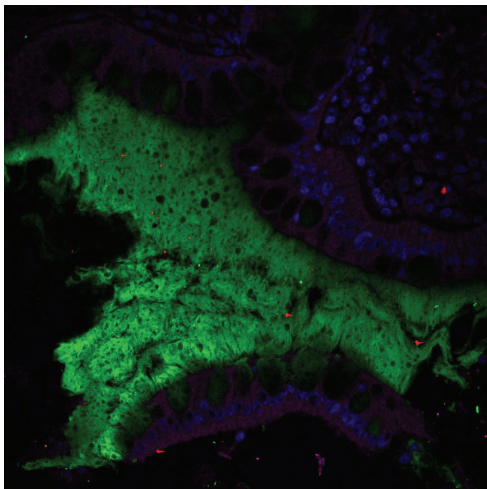

Microbiota - IEC = 38.91µm

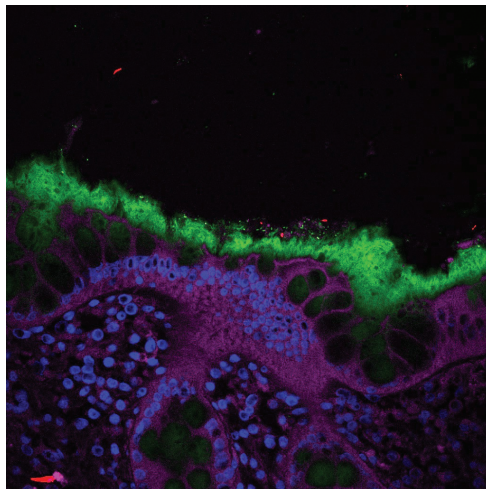

Microbiota - IEC = 23.86µm

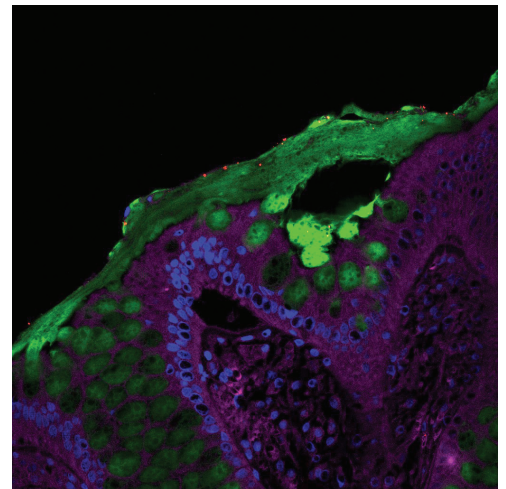

Microbiota - IEC = 22.69µm

**Figure S13: Effect of carboxymethylcellulose consumption on microbiota localization**

**Table S2.** NMR data for the metabolites found in stool (S) and urine (U).

| NO. | Metabolites | Moieties                   | $\delta$ $^1\text{H}$ (ppm) | $\delta$ $^{13}\text{C}$ (ppm) | Location | Source*   |
|-----|-------------|----------------------------|-----------------------------|--------------------------------|----------|-----------|
| 1   | acetone     | CH <sub>3</sub>            | 2.23(s) <sup>a</sup>        | 33.2                           | S        |           |
| 2   | butyrate    | CH <sub>3</sub>            | 0.90(t)                     | 16.3                           | S        | microbial |
|     |             | $\beta$ CH <sub>2</sub>    | 1.56(m)                     | 21.5                           |          |           |
|     |             | $\alpha$ CH <sub>2</sub>   | 2.15(t)                     | 42.7                           |          |           |
|     |             | COOH                       |                             | 186.8                          |          |           |
| 3   | isoleucine  | $\delta$ CH <sub>3</sub>   | 0.94(t)                     | 14.2                           | S        |           |
|     |             | $\gamma$ CH <sub>3</sub>   | 1.01(d)                     | 17.7                           |          |           |
|     |             | $\gamma$ CH <sub>2</sub>   | 1.25(m)                     | 27.5                           |          |           |
|     |             | $\gamma'$ CH <sub>2</sub>  | 1.48(m)                     | 27.5                           |          |           |
|     |             | $\beta$ CH                 | 1.98(m)                     | 37.7                           |          |           |
|     |             | $\alpha$ CH                | 3.67(d)                     | 62.4                           |          |           |
|     |             | COOH                       |                             | 177.1                          |          |           |
| 4   | leucine     | $\delta$ CH <sub>3</sub>   | 0.96(d)                     | 24.5                           | S        |           |
|     |             | $\delta$ CH <sub>3</sub>   | 0.97(d)                     | 23.5                           |          |           |
|     |             | $\gamma$ CH                | 1.69(m)                     | 27.3                           |          |           |
|     |             | $\beta$ CH <sub>2</sub>    | 1.71(m)                     | 42.8                           |          |           |
|     |             | $\alpha$ CH                | 3.74(t)                     | 56.4                           |          |           |
|     |             | COOH                       |                             | 178.3                          |          |           |
| 5   | valine      | $\gamma$ CH <sub>3</sub>   | 0.99(d)                     | 19.6                           | S        |           |
|     |             | $\gamma$ CH <sub>3</sub>   | 1.04(d)                     | 20.7                           |          |           |
|     |             | $\beta$ CH                 | 2.27(m)                     | 32.0                           |          |           |
|     |             | $\alpha$ CH                | 3.62(d)                     | 63.3                           |          |           |
|     |             | COOH                       |                             | 177.1                          |          |           |
| 6   | propionate  | CH <sub>3</sub>            | 1.06(t)                     | 13.2                           | S        | microbial |
|     |             | CH <sub>2</sub>            | 2.19(q)                     | 33.7                           |          |           |
|     |             | COOH                       |                             | 187.4                          |          |           |
| 7   | lactate     | CH <sub>3</sub>            | 1.33(d)                     | 22.5                           | S, U     |           |
|     |             | CH                         | 4.11(q)                     | 71.9                           |          |           |
|     |             | COOH                       |                             | 185.3                          |          |           |
| 8   | alanine     | $\beta$ CH <sub>3</sub>    | 1.48(d)                     | 19.2                           | S, U     |           |
|     |             | $\alpha$ CH                | 3.79(q)                     | 53.4                           |          |           |
|     |             | COOH                       |                             | 178.8                          |          |           |
| 9   | lysine      | $\gamma$ CH <sub>2</sub>   | 1.48(m)                     | 23.9                           | S        |           |
|     |             | $\delta$ CH <sub>2</sub>   | 1.72(m)                     | 29.4                           |          |           |
|     |             | $\beta$ CH <sub>2</sub>    | 1.90(m)                     | 33.0                           |          |           |
|     |             | $\epsilon$ CH <sub>2</sub> | 3.03(t)                     | 42.2                           |          |           |
|     |             | $\alpha$ CH                | 3.76(t)                     | 57.6                           |          |           |
|     |             | COOH                       |                             | 177.5                          |          |           |
| 10  | acetate     | CH <sub>3</sub>            | 1.92(s)                     | 26.2                           | S, U     | microbial |
|     |             | COOH                       |                             | 184.2                          |          |           |
| 11  | glutamate   | $\beta$ CH <sub>2</sub>    | 2.10(m)                     | 30.1                           | S        |           |
|     |             | $\beta'$ CH <sub>2</sub>   | 2.09(m)                     | 30.1                           |          |           |
|     |             | $\gamma$ CH <sub>2</sub>   | 2.36(m)                     | 36.4                           |          |           |
|     |             | $\alpha$ CH                | 3.77(m)                     | 57.6                           |          |           |

|    |                     |                                  |          |       |      |
|----|---------------------|----------------------------------|----------|-------|------|
|    |                     | C=O                              |          | 184.0 |      |
|    |                     | COOH                             |          | 177.5 |      |
| 12 | methionine          | $\delta$ CH <sub>3</sub>         | 2.14(s)  | 16.8  | S    |
|    |                     | $\beta$ CH <sub>2</sub>          | 2.16(m)  | 33.2  |      |
|    |                     | $\gamma$ CH <sub>2</sub>         | 2.65(t)  | 31.6  |      |
|    |                     | $\alpha$ CH                      | 3.86(m)  | 56.9  |      |
|    |                     | COOH                             |          | 176.6 |      |
| 13 | succinate           | CH <sub>2</sub>                  | 2.41(s)  | 37.6  | S, U |
|    |                     | COOH                             |          | 184.4 |      |
| 14 | citrate             | CH <sub>2</sub>                  | 2.54(d)  | 46.5  | U    |
|    |                     | 'CH <sub>2</sub>                 | 2.66(d)  | 46.5  |      |
|    |                     | C-OH                             |          | 76.4  |      |
|    |                     | COOH                             |          | 181.5 |      |
|    |                     | COOH                             |          | 183.9 |      |
| 15 | aspartate           | $\beta$ CH <sub>2</sub>          | 2.68(m)  | 39.5  | S    |
|    |                     | $\beta'$ CH <sub>2</sub>         | 2.82(m)  | 39.5  |      |
|    |                     | $\alpha$ CH                      | 3.91(m)  | 55.3  |      |
|    |                     | $\beta$ COOH                     |          | 180.5 |      |
|    |                     | $\alpha$ COOH                    |          | 176.9 |      |
| 16 | asparagine          | $\beta$ CH <sub>2</sub>          | 2.86(dd) | 37.6  | S    |
|    |                     | $\beta'$ CH <sub>2</sub>         | 2.96(dd) | 37.6  |      |
|    |                     | $\alpha$ CH                      | 4.00(m)  | 54.3  |      |
|    |                     | C=O                              |          | 177.1 |      |
|    |                     | COOH                             |          | 176.3 |      |
| 17 | dimethylamine (DMA) | CH <sub>3</sub>                  | 2.72(s)  | 39.4  | U    |
| 18 | creatine            | CH <sub>3</sub>                  | 3.04(s)  | 40.0  | S    |
|    |                     | CH <sub>2</sub>                  | 3.93(s)  | 57.1  |      |
|    |                     | C=NH                             |          | 159.4 |      |
|    |                     | COOH                             |          | 177.2 |      |
| 19 | choline             | N(CH <sub>3</sub> ) <sub>3</sub> | 3.21(s)  | 56.8  | S, U |
|    |                     | NCH <sub>2</sub>                 | 3.52(m)  | 58.5  |      |
|    |                     | OCH <sub>2</sub>                 | 4.07(m)  | 70.2  |      |
| 20 | taurine             | CH <sub>2</sub> SO <sub>3</sub>  | 3.25(t)  | 50.7  | S, U |
|    |                     | NCH <sub>2</sub>                 | 3.43(t)  | 38.5  |      |
| 21 | glycine             | CH <sub>2</sub>                  | 3.57(s)  | 44.6  | S, U |
|    |                     | COOH                             |          | 175.2 |      |
| 22 | $\alpha$ -glucose   | 4CH                              | 3.42(dd) | 72.7  | S    |
|    |                     | 2CH                              | 3.54(dd) | 74.9  |      |
|    |                     | 3CH                              | 3.73(dd) | 76.2  |      |
|    |                     | 5CH                              | 3.83(dd) | 74.4  |      |
|    |                     | 6CH <sub>2</sub>                 | 3.83(dd) | 63.7  |      |
|    |                     | 1CH                              | 5.24(d)  | 95.4  |      |



|                          |                  |                          |               |                         |   |
|--------------------------|------------------|--------------------------|---------------|-------------------------|---|
| 23                       | $\beta$ -glucose | 2CH                      | 3.26(dd)      | 77.5                    | S |
|                          |                  | 4CH                      | 3.40(dd)      | 72.9                    |   |
|                          |                  | 5CH                      | 3.47(dd)      | 79.0                    |   |
|                          |                  | 3CH                      | 3.50(dd)      | 79.0                    |   |
|                          |                  | 6CH                      | 3.74(dd)      | 63.7                    |   |
|                          |                  | 6CH'                     | 3.90(dd)      | 63.9                    |   |
|                          |                  | 1CH                      | 4.45(d)       | 99.3                    |   |
| 24                       | uracil           | CH                       | 5.81(d)       | 103.9                   | S |
|                          |                  | CH                       | 7.54(d)       | 146.5                   |   |
|                          |                  | C=O                      |               | 170.6                   |   |
|                          |                  | C=O                      |               | 155.9                   |   |
| 25                       | fumarate         | CH                       | 6.53(s)       | 138.1                   | S |
|                          |                  | COOH                     |               | 179.2                   |   |
| 26                       | tyrosine         | $\beta$ CH <sub>2</sub>  | 3.06(dd)      | 38.3                    | S |
|                          |                  | $\beta'$ CH <sub>2</sub> | 3.15(dd)      | 38.3                    |   |
|                          |                  | $\alpha$ CH              | 3.94(dd)      | 59.2                    |   |
|                          |                  | 3 or 5CH                 | 6.91(d)       | 118.8                   |   |
|                          |                  | 2 or 6CH                 | 7.20(d)       | 132.4                   |   |
|                          |                  | C(ring)                  |               | 129.4                   |   |
|                          |                  | C-OH(ring)               |               | 157.7                   |   |
|                          |                  | COOH                     |               | 177.1                   |   |
| 27                       | tryptophan       | $\beta$ CH <sub>2</sub>  | 3.31(dd)      | 29.5                    | S |
|                          |                  | $\beta'$ CH <sub>2</sub> | 3.49(dd)      | 29.5                    |   |
|                          |                  | $\alpha$ CH              | 4.06(dd)      | 58.5                    |   |
|                          |                  | 5CH                      | 7.21(t)       | 122.5                   |   |
|                          |                  | 6CH                      | 7.29(t)       | 125.0                   |   |
|                          |                  | 2CH                      | 7.33(s)       | 128.2                   |   |
|                          |                  | 7CH                      | 7.55(d)       | 114.9                   |   |
|                          |                  | 4CH                      | 7.74(d)       | 121.5                   |   |
|                          |                  | COOH                     |               | 177.4                   |   |
|                          |                  |                          |               |                         |   |
|                          |                  | 28                       | phenylalanine | $\beta$ CH <sub>2</sub> |   |
| $\beta'$ CH <sub>2</sub> | 3.29(dd)         |                          |               | 38.4                    |   |
| $\alpha$ CH              | 3.98(dd)         |                          |               | 59.3                    |   |
| 2 or 6CH                 | 7.33(m)          |                          |               | 130.7                   |   |
| 4CH                      | 7.38(m)          |                          |               | 131.9                   |   |
| 3 or 5CH                 | 7.43(m)          |                          |               | 132.0                   |   |
| C(ring)                  |                  |                          |               | 139.4                   |   |
| COOH                     |                  |                          |               | 176.4                   |   |
| 29                       | histidine        | $\beta$ CH <sub>2</sub>  | 3.14(dd)      | 30.8                    | S |
|                          |                  | $\beta'$ CH <sub>2</sub> | 3.25(dd)      | 30.8                    |   |
|                          |                  | $\alpha$ CH              | 3.99(dd)      | 58.7                    |   |
|                          |                  | 5CH                      | 7.08(s)       | 120.1                   |   |
|                          |                  | 3CH                      | 7.83(s)       | 138.3                   |   |
|                          |                  | C(ring)                  |               | 133.6                   |   |
| 30                       | formate          | COOH                     |               | 176.4                   | S |
|                          |                  | CH                       | 8.45(s)       | 172.4                   |   |

|    |                                |    |                   |           |       |   |           |
|----|--------------------------------|----|-------------------|-----------|-------|---|-----------|
| 31 | hypoxanthine                   |    | 8CH               | 8.20(s)   | 145.6 | S |           |
|    |                                |    | 6CH               | 8.22(s)   | 149.2 |   |           |
| 32 | inosine                        |    | CH <sub>2</sub>   | 3.85(dd)  | 63.8  | S |           |
|    |                                |    | 'CH <sub>2</sub>  | 3.92(dd)  | 63.8  |   |           |
|    |                                |    | 5H'               | 4.28(q)   | 88.6  |   |           |
|    |                                |    | 4H'               | 4.44(t)   | 73.4  |   |           |
|    |                                |    | 2H'               | 6.10(d)   | 91.4  |   |           |
|    |                                |    | 8H                | 8.24(s)   | 150.1 |   |           |
|    |                                |    | 2H                | 8.34(s)   | 143.3 |   |           |
| 33 | xanthine                       |    | 8CH               | 7.89(s)   | 144.0 | S |           |
| 34 | uridine                        |    | CH <sub>2</sub>   | 3.81(d)   | 64.3  | S |           |
|    |                                |    | 'CH <sub>2</sub>  | 3.92(d)   | 64.3  |   |           |
|    |                                |    | 4H'               | 4.14(q)   | 86.6  |   |           |
|    |                                |    | 3H'               | 4.24(t)   | 73.1  |   |           |
|    |                                |    | 2H'               | 4.36(t)   | 78.0  |   |           |
|    |                                |    | 5H                | 5.90(d)   | 95.2  |   |           |
|    |                                |    | 6H                | 5.91(d)   | 90.8  |   |           |
|    |                                |    | 1H'               | 7.87(d)   | 144.1 |   |           |
| 35 | creatinine                     |    | CH <sub>3</sub>   | 3.05(s)   | 33.2  | U |           |
|    |                                |    | CH <sub>2</sub>   | 4.06(s)   | 59.2  |   |           |
| 36 | trimethylamine<br>oxide (TMAO) | N- | N-CH <sub>3</sub> | 3.27(s)   | 62.5  | U | microbial |
| 37 | hippurate                      |    | αCH <sub>2</sub>  | 3.97(s)   | 47.2  | U |           |
|    |                                |    | 3 or 5 CH         | 7.56(dd)  | 132.1 |   |           |
|    |                                |    | 4CH               | 7.64(t)   | 135.5 |   |           |
|    |                                |    | 2 or 6 CH         | 7.83(dd)  | 130.2 |   |           |
|    |                                |    | NH                | 8.56(brs) |       |   |           |
|    |                                |    | C=O               |           | 173.3 |   |           |
|    |                                |    | COOH              |           | 180.0 |   |           |
| 38 | phenylacetylglycine<br>(PAG)   |    | CH <sub>2</sub>   | 3.65(s)   | 45.2  | U |           |
|    |                                |    | 2 or 6 CH         | 7.36(m)   | 132.0 |   |           |
|    |                                |    | 4CH               | 7.36(m)   | 119.3 |   |           |
|    |                                |    | 3 or 5 CH         | 7.42(m)   | 132.0 |   |           |
|    |                                |    | C=O               |           | 167.8 |   |           |
| 39 | p-<br>hydroxyphenylacetate     |    | CH <sub>2</sub>   | 3.45(s)   | 46.9  | U | microbial |
|    |                                |    | 2 or 6 CH         | 6.87(d)   | 118.2 |   |           |
|    |                                |    | 3 or 5 CH         | 7.16(d)   | 133.4 |   |           |
|    |                                |    | C-OH              |           | 156.9 |   |           |
|    |                                |    | COOH              |           | 182.7 |   |           |
| 40 | indoxyl sulfate                |    | 5CH               | 7.20(m)   | 123.0 | U | microbial |
|    |                                |    | 6CH               | 7.27(m)   | 125.2 |   |           |
|    |                                |    | 2CH               | 7.36(s)   | 118.7 |   |           |
|    |                                |    | 7CH               | 7.50(m)   | 115.0 |   |           |
|    |                                |    | 4CH               | 7.70(m)   | 120.3 |   |           |

|    |                         |                 |          |       |   |
|----|-------------------------|-----------------|----------|-------|---|
| 41 | 1-methylnicotinamide    | CH <sub>3</sub> | 4.48(s)  | 51.3  | U |
|    |                         | 5CH             | 8.18(m)  | 130.9 |   |
|    |                         | 4CH             | 8.89(dt) | 146.4 |   |
|    |                         | 6CH             | 8.96(m)  | 150.0 |   |
|    |                         | 2CH             | 9.27(m)  | 147.9 |   |
| 42 | <i>scyllo</i> -inositol | CHOH            | 3.35(s)  | 74.3  | U |

<sup>a</sup> s, singlet; d, double; t, triplet; q, quartet; m, multiplet; dd, double of doubles; dt, double of triplet.

\*Only the microbial metabolic products are indicated. Other metabolites have more complicated sources <sup>18-20</sup>.

18. Krautkramer KA, Fan J, Backhed F. Gut microbial metabolites as multi-kingdom intermediates. *Nat Rev Microbiol* 2021;19:77-94.
19. Hosseinkhani F, Heinken A, Thiele I, et al. The contribution of gut bacterial metabolites in the human immune signaling pathway of non-communicable diseases. *Gut Microbes* 2021;13:1-22.
20. Vernocchi P, Del Chierico F, Putignani L. Gut Microbiota Profiling: Metabolomics Based Approach to Unravel Compounds Affecting Human Health. *Front Microbiol* 2016;7:1144.
